# Supplementary material for: Hepatoprotective Effects ofMorchella esculentaagainst Alcohol-Induced Acute Liver Injury in the C57BL/6 Mouse Related to Nrf-2 and NF-κB Signaling
Source: Hindawi journal article supplement (doi:10.1155/2019/6029876), 2019-07-17
Supplement: f1 [file 6029876.f1.pdf]

## Supplementary Materials

### Results

#### **ME showed significant effects on the bodyweights of acute alcohol-exposed mice**

During the two-week trial period, the weight of mice in the alcohol group was decreased upto 8.3% compared with that of the control group. ME treatment significantly enhanced the bodyweights of acute alcohol-exposed mice but not Sil. (Table. 1S). ME alone showed no significant effects on the bodyweight of healthy mice, indicating the safe using of ME (Figure.1S A).

#### **ME showed significant effects on cytokines related to oxidative stress in spleen of alcohol-treated mice**

Compared with acute alcohol-exposed mice, two weeks of ME treatment strongly reduced the levels of ROS, MDA and NO, and enhanced the levels of SOD, GSH-Px and CAT in spleen of mice with acute alcohol injury ( $P < 0.05$ ; Table. 2S).

#### **The effect of ME on AST, ALT and ALDH**

Compared with normal control group, ME alone showed no significant effects on the levels of AST, ALT and ALDH in serum of healthy mice (Fig. 2S B-D).

**Table. 1S** The effects of ME and Sil on bodyweight of experimental mice

|                      | CTRL       | Alcohol                 | Alcohol + Sil<br>(60 mg/kg) | Alcohol + ME<br>(200 mg/kg) | Alcohol + ME<br>(400 mg/kg) | Alcohol + ME<br>(800 mg/kg) |
|----------------------|------------|-------------------------|-----------------------------|-----------------------------|-----------------------------|-----------------------------|
| 1 <sup>st</sup> day  | 21.9 ± 0.2 | 22.4 ± 0.2              | 22.5 ± 0.3                  | 21.6 ± 0.5                  | 22.6 ± 0.4                  | 22.7±0.3                    |
| 3 <sup>th</sup> day  | 21.7 ± 0.2 | 19.9 ± 0.2              | 19.4 ± 0.2                  | 19.1 ± 0.3                  | 19.8 ± 0.5                  | 20.7±0.3                    |
| 6 <sup>th</sup> day  | 21.5 ± 0.3 | 17.6 ± 0.3 <sup>#</sup> | 18.6 ± 0.3                  | 16.8 ± 0.3                  | 20.6 ± 0.4 <sup>*</sup>     | 20.5±0.5 <sup>*</sup>       |
| 9 <sup>st</sup> day  | 20.2 ± 0.3 | 18.2 ± 0.3 <sup>#</sup> | 18.9 ± 0.4                  | 18.2 ± 0.6                  | 20.0 ± 0.5 <sup>*</sup>     | 20.3±0.4 <sup>*</sup>       |
| 12 <sup>st</sup> day | 21.6 ± 0.3 | 19.8 ± 0.4 <sup>#</sup> | 20.3 ± 0.4                  | 19.7 ± 0.6                  | 21.4 ± 0.7 <sup>*</sup>     | 20.1±0.4                    |

Date were presented as mean ± S.E.M. (n=10). <sup>#</sup> *P*<0.05 compared with control group, <sup>\*</sup> *P*<0.05 compared with **alcohol only treated mice**. ME: *M. esculenta*; Sil: silybin.

**Table. 2S** The effects of ME and Sil on cytokines related to oxidative stress in the spleens of mice with alcohol-induced acute liver injury.

|               | CTRL        | Alcohol                   | Alcohol + Sil<br>(60 mg/kg) | Alcohol + ME<br>(200 mg/kg) | Alcohol + ME<br>(400 mg/kg) | Alcohol + ME<br>(800 mg/kg) |
|---------------|-------------|---------------------------|-----------------------------|-----------------------------|-----------------------------|-----------------------------|
| ROS (U/mg)    | 209.9 ± 3.3 | 305.4 ± 9.2 <sup>##</sup> | 243.6 ± 11.0 <sup>**</sup>  | 241.5 ± 19.8 <sup>*</sup>   | 198.4 ± 12.6 <sup>**</sup>  | 158.4 ± 5.0 <sup>***</sup>  |
| MDA (nmol/mg) | 8.0 ± 0.1   | 10.9 ± 0.4 <sup>##</sup>  | 9.2 ± 0.3 <sup>*</sup>      | 8.8 ± 0.7 <sup>*</sup>      | 8.0 ± 0.6 <sup>**</sup>     | 8.0 ± 0.5 <sup>**</sup>     |
| NO (μmol/g)   | 14.1 ± 0.3  | 16.7 ± 0.8 <sup>#</sup>   | 17.0 ± 0.3                  | 15.4 ± 0.6                  | 14.2 ± 0.7 <sup>*</sup>     | 14.0 ± 0.8 <sup>*</sup>     |
| SOD (U/mg)    | 161.4 ± 3.8 | 124.2 ± 4.5 <sup>##</sup> | 156.2 ± 3.0 <sup>**</sup>   | 155.3 ± 8.8 <sup>**</sup>   | 140.9 ± 6.9 <sup>*</sup>    | 153.5 ± 7.8 <sup>**</sup>   |
| GSH-Px (U/mg) | 260.3 ± 5.3 | 226.2 ± 12.5 <sup>#</sup> | 266.2 ± 9.3 <sup>*</sup>    | 234.3 ± 10.9                | 230.3 ± 15.5                | 251.7 ± 12.1 <sup>*</sup>   |
| CAT(U/mg)     | 23.5 ± 0.6  | 22.5 ± 2.0                | 25.5 ± 0.8                  | 30.1 ± 3.0 <sup>**</sup>    | 20.0 ± 1.5                  | 21.6 ± 1.5                  |

Date were presented as mean ± S.E.M. (n=10). <sup>#</sup>*P*< 0.05 and <sup>##</sup> *P*< 0.01 compared with control group, <sup>\*</sup> *P*< 0.05, <sup>\*\*</sup> *P*< 0.01 and <sup>\*\*\*</sup> *P*<0.001 **compared with alcohol only treated mice**. ME: *M. esculenta*; Sil: silybin.

## Figure List

Figure 1S. ME alone (800 mg/kg) showed no significant effects on bodyweight or biochemical indexes in serum of healthy mice after 14-day administration. (A) ME alone failed to influence the bodyweight of healthy mice. ME alone showed no effects on the serum levels of (B) AST, (C) ALT and (D) ALDH in healthy mice. Data expressed as mean  $\pm$  S.E.M. (n=10) were analyzed using a one-way ANOVA. ME: *M. esculenta*.

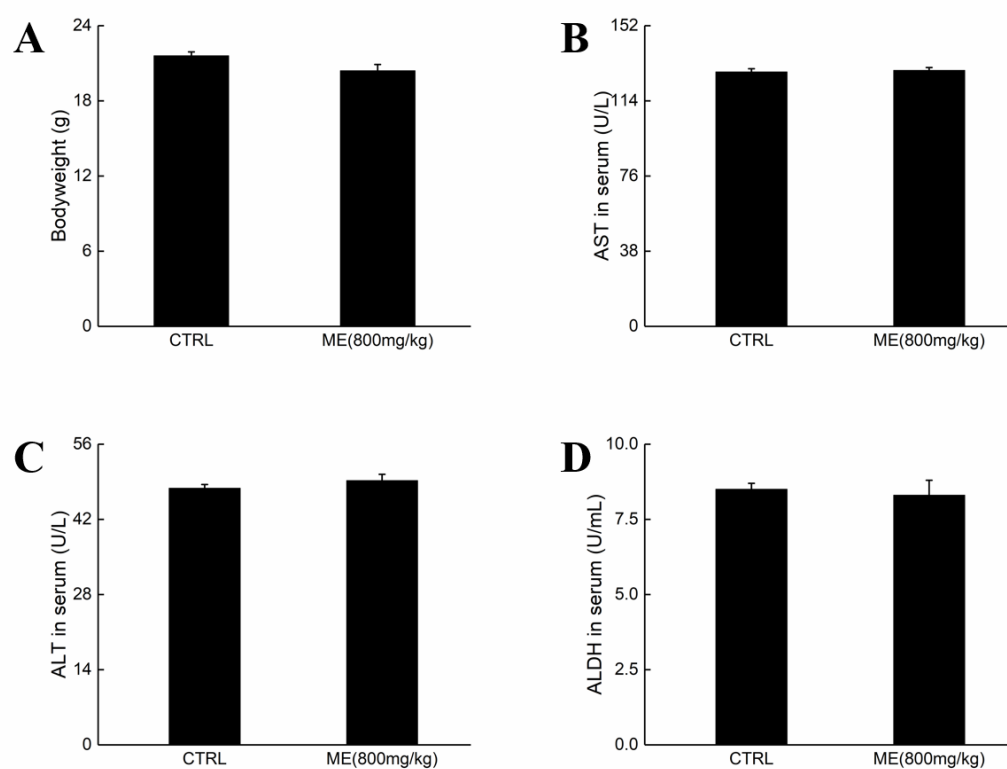

Figure.1S
